# Supplementary material
Source: PubMed Central journal article supplement (PMC3230292)
Supplement: cbt1011_1147SD1.pdf [file cbt1011_1147SD1.pdf]

**A**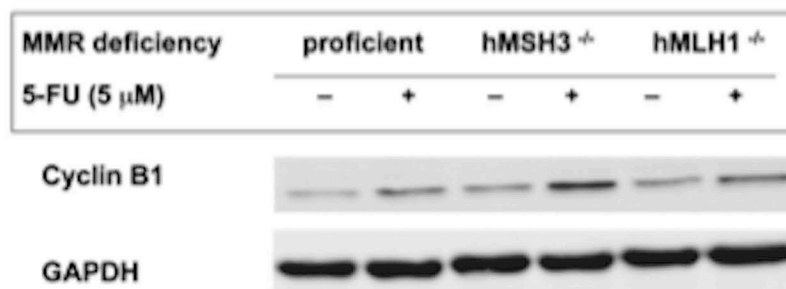**B**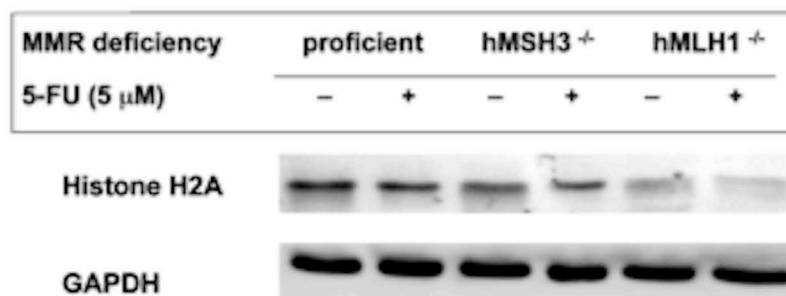**C**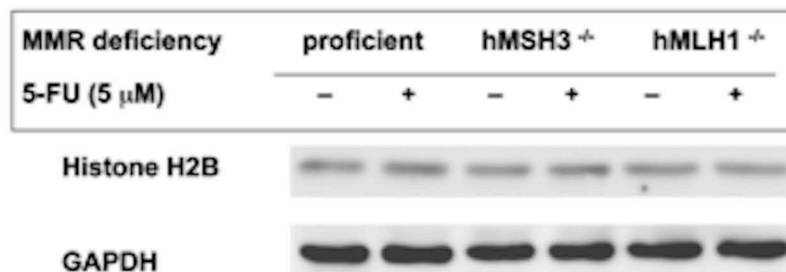

**A**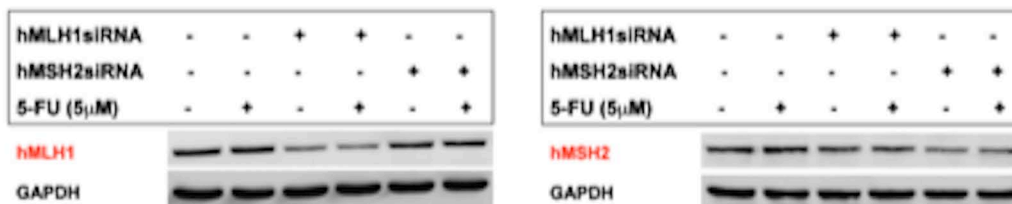**B**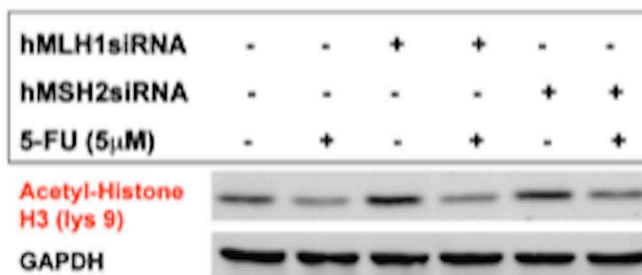**C**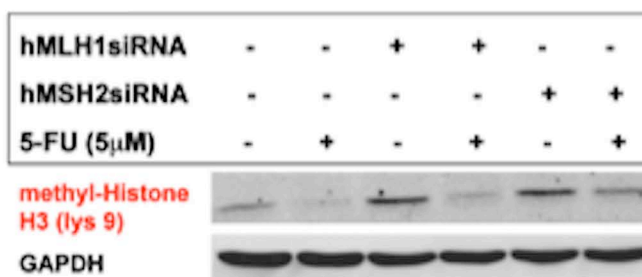**D**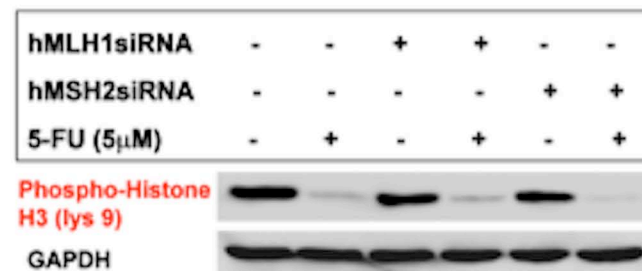

Decreased histone H3 modifications by 5-FU in MMR proficient HT29 cells are not dependent on either *hMLH1* or *hMSH2*.
